# Supplementary material for: Quantification of the catalytic performance of C1-cellulose-specific lytic polysaccharide monooxygenases
Source: PubMed Central journal article supplement (PMC5778151; doi:10.1007/s00253-017-8541-9), 2017-12-02
Supplement: 253_2017_8541_MOESM1_ESM.pdf [file 253_2017_8541_MOESM1_ESM.pdf]

1 **Applied Microbiology and Biotechnology**

2

3 **Quantification of the catalytic performance of C1-cellulose specific**  
4 **lytic polysaccharide monooxygenases**

5 Matthias Frommhagen<sup>a</sup>, Adrie H Westphal<sup>b</sup>, Roelant Hilgers<sup>a</sup>, Martijn J Koetsier<sup>c</sup>, Sandra W A Hinz<sup>c</sup>, Jaap Visser<sup>d</sup>,  
6 Harry Gruppen<sup>a</sup>, Willem J H van Berkel<sup>b</sup>, Mirjam A Kabel<sup>a</sup>

7

8 <sup>a</sup>Laboratory of Food Chemistry, Wageningen University & Research, Bornse Weilanden 9, 6708 WG Wageningen,  
9 The Netherlands

10 <sup>b</sup>Laboratory of Biochemistry, Wageningen University & Research, Stippeneng 4, 6708 WE Wageningen, The  
11 Netherlands

12 <sup>c</sup>DuPont Industrial Biosciences, Netherlands, Nieuwe Kanaal 7-S, 6709 PA Wageningen, The Netherlands

13 <sup>d</sup>Fungal Genetics & Technology Consultancy, P.O. Box 396, 6700 AJ Wageningen, The Netherlands

14

15 Corresponding author:

16 Mirjam A Kabel, Laboratory of Food Chemistry, Wageningen University & Research, Bornse Weilanden 9, 6708  
17 WG Wageningen, The Netherlands

18 E-mail: mirjam.kabel@wur.nl

## 19 **Supplementary Material**

### 20 **Methods**

#### 21 **Enzyme purification of *MtLPMO9D***

22 First, hydrophobic interaction chromatography (HIC) was applied by loading the *MtLPMO9D*-containing enzyme  
23 preparation on a self-packed Phenyl Sepharose Fast Flow column (450 mL, GE Healthcare, Uppsala, Sweden).  
24 The column was pre-equilibrated with 3 column volumes of a 20 mM potassium phosphate buffer (pH 7.8)  
25 containing 0.9 M ammonium sulphate. After sample loading, a linear gradient from 0.9 to 0 M ammonium sulphate  
26 in a 20 mM potassium phosphate buffer (pH 7.8) was applied at a flow rate of 5 mL min<sup>-1</sup> over 4 column volumes.  
27 All fractions were collected and immediately stored on ice. Peak fractions were, based on UV (280 nm), pooled  
28 and concentrated by ultrafiltration (Amicon Ultra, molecular mass cut-off of 3 kDa, Merck Millipore, Cork,  
29 Ireland) at 4°C. The concentrated pools were analyzed by SDS-PAGE to determine the *MtLPMO9D*-containing  
30 pool (expected molecular mass 25.4 kDa). The second purification step was applied by using anion exchange  
31 chromatography (AEC). The *MtLPMO9D*-containing fraction was loaded on a Source 30 Q column (50 mL, GE  
32 Healthcare) and the column was equilibrated with a 20 mM potassium phosphate buffer (pH 7.8) at a flow rate of  
33 5 mL min<sup>-1</sup> for 2 column volumes. The elution was performed by using a linear gradient from 0 to 1 M potassium  
34 chloride in 20 mM potassium phosphate buffer (pH 7.8) at a flow rate of 5 mL min<sup>-1</sup> for 10 column volumes.  
35 Fractions obtained (10 mL) were immediately stored on ice. Peak fractions were pooled, concentrated and analyzed  
36 by SDS-PAGE as described above. In a third purification (HIC) step, the *MtLPMO9D*-containing pool was loaded  
37 on a Phenyl Sepharose Fast Flow column (50 mL, GE Healthcare). The column was pre-equilibrated with a 1.2 M  
38 ammonium sulphate in a 20 mM potassium phosphate buffer (pH 7.8). The elution was performed using a linear  
39 gradient elution from 1.2 to 0 mM ammonium sulphate in a 20 mM potassium phosphate buffer (pH 7.8) at a flow  
40 rate of 5 mL min<sup>-1</sup> for 4 column volumes. Again, all fractions were immediately stored on ice. The obtained peak  
41 fractions were pooled, concentrated and analyzed by SDS-PAGE to determine the *MtLPMO9D*-containing pool  
42 as described above. As a fourth purification step, size exclusion chromatography (SEC) was applied. The  
43 *MtLPMO9D*-containing pool was subjected to a Superdex 75 (250 mL column, GE Healthcare). The equilibration  
44 and isocratic elution (2 and 1.5 column volumes, respectively) was performed using a 20 mM potassium phosphate  
45 buffer at a flow rate of 3 mL min<sup>-1</sup>. Fractions were immediately stored on ice. Peak fractions were pooled,  
46 concentrated and analyzed by SDS-PAGE to determine the *MtLPMO9D*-containing pool as described above. In a  
47 fifth purification step, the *MtLPMO9D*-containing fraction was loaded on a Resource Q column (30 x 16 mm  
48 internal diameter, GE Healthcare). A 20 mM potassium phosphate buffer (pH 7.0) was used to pre-equilibrate the  
49 column. Elution was performed using a linear gradient from 0 to 1 M NaCl in a 20 mM potassium phosphate buffer  
50 (pH 7.0) at a flow rate of 6 mL min<sup>-1</sup> over 20 column volumes and monitored at 220 and 280 nm. All fractions  
51 were collected and immediately stored on ice. The fractions of the most abundant peak contained purified  
52 *MtLPMO9D*. Finally, these fractions were pooled, concentrated and stored at -20°C.

53 **Supplementary Material**

54 **Methods**

55 **Structural features of *MtLPMO9B* and *MtLPMO9D***

56 Based on the predicted secondary structure, the percentage of antiparallel  $\beta$ -sheets was overestimated by about  
57 20% whereas the amount of  $\beta$ -turns was underestimated (-25%) (Supplemental Fig. S8) compared to the actual  
58 secondary structure of *MtPMO3\**. In contrast, the percentage of predicted  $\alpha$ -helices corresponded to the amount  
59 of  $\alpha$ -helices present in *MtPMO3\**. The deviation between the predicted and the actual secondary structure is likely  
60 to result from the limited CD spectral data obtained below 200 nm, which is of importance to obtain a more  
61 accurate secondary structure prediction (Kelly et al. 2005). Especially the CD spectrum of *MtLPMO9B* showed  
62 an atypical break below 200 nm, which was also observed if a lower protein concentration ( $0.1 \text{ mg mL}^{-1}$ ) was used  
63 (data not shown). Possibly, the conditions used (e.g. type of buffer and or pH) were suboptimal for determining a  
64 more accurate CD spectrum of the *MtLPMOs* in the lower wavelength range ( $< 200 \text{ nm}$ ). Still, the accuracy of the  
65 predicted compared to the actual secondary structure is in agreement with values reported in the literature and,  
66 therefore, was further used to determine the conformational stability of the *MtLPMOs* upon heating (Micsonai et  
67 al. 2015).

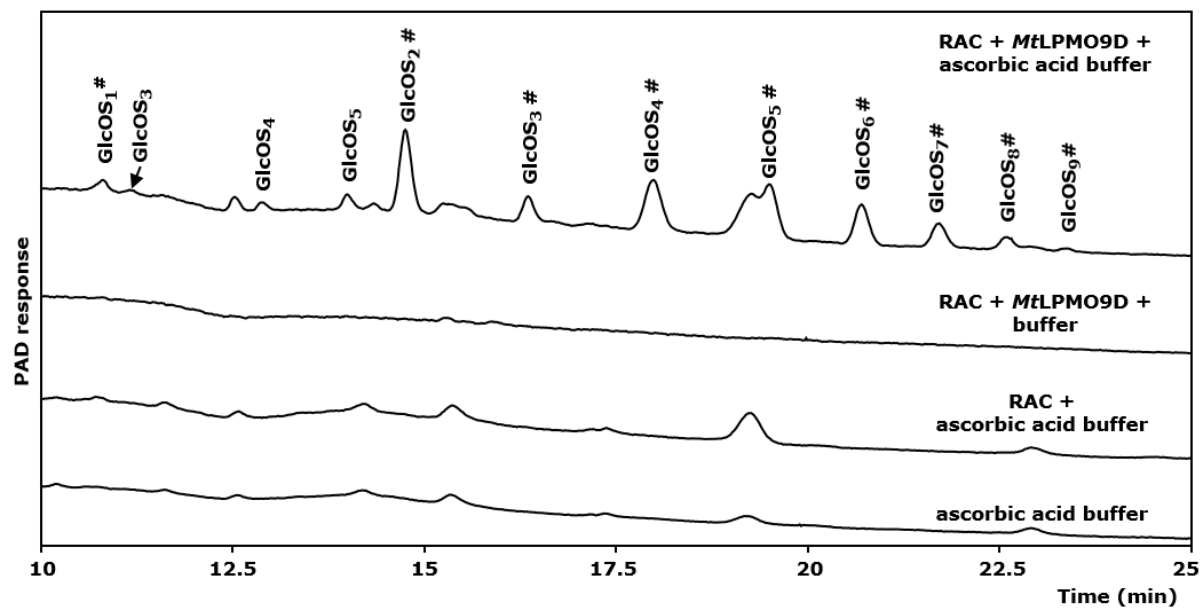

69  
 70 **Fig. S1** Activity of *MtLPMO9D* towards amorphous cellulose. HPAEC elution pattern of regenerated amorphous  
 71 cellulose (RAC) after incubation with *MtLPMO9D* ( $2.5 \text{ mg g}^{-1}$  substrate). Nomenclature used:  $\text{GlcOS}_n$ , non-  
 72 oxidized gluco-oligosaccharides and  $\text{GlcOS}_n^\#$ , gluco-oligosaccharides oxidized at the C1 carbon atom. Only in the  
 73 presence of ascorbic acid, C1-oxidized  $\text{GlcOS}_n^\#$  are formed by *MtLPMO9D*. Samples were incubated in a 50 mM  
 74 ammonium acetate buffer (pH 5.0) at  $52^\circ\text{C}$  for 24 h in the absence or presence of ascorbic acid (1 mM).

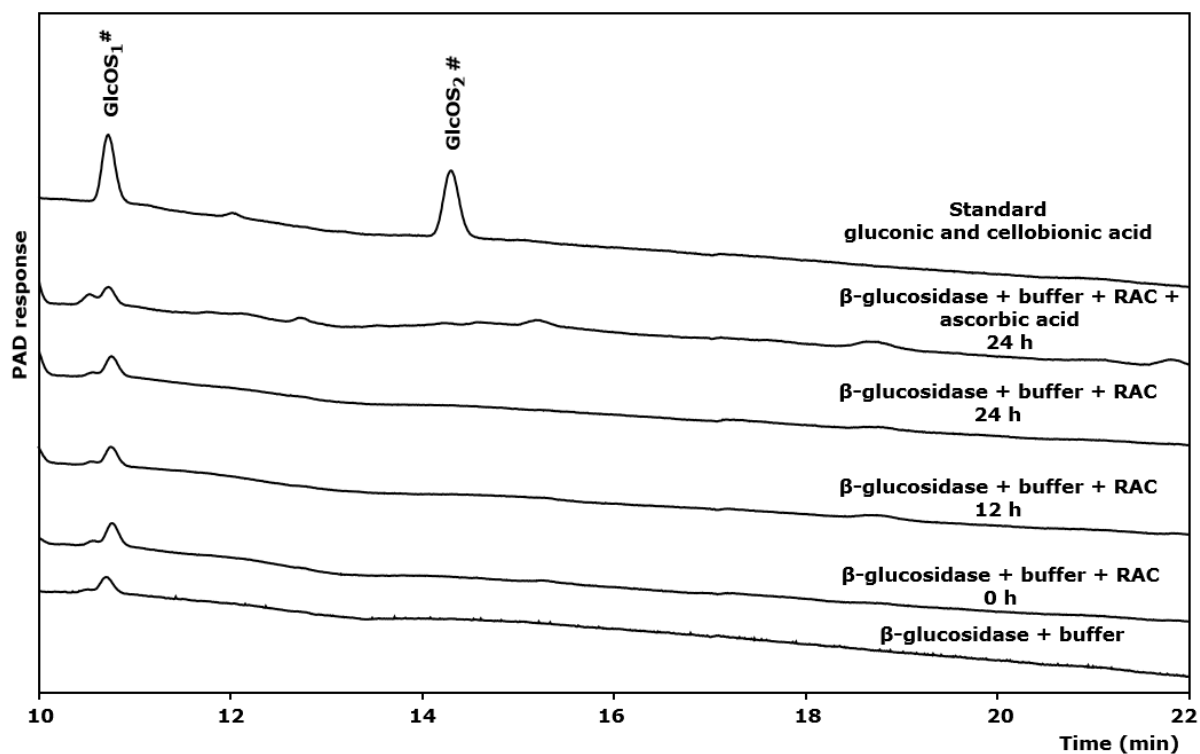

75

76 **Fig. S2.** HPAEC elution pattern of various soluble supernatants incubated with  $\beta$ -glucosidase. First, all samples  
 77 (buffer only, RAC in buffer (0, 12, and 24 h) and RAC in buffer and in the presence of ascorbic acid (24 h)) were  
 78 incubated in a 50 mM ammonium acetate buffer (pH 5.0) at 50°C. Subsequently, the obtained soluble supernatants  
 79 (250  $\mu$ L) were incubated with  $\beta$ -glucosidase (1.0 U per sample) as described in the Methods section. No oxidized  
 80 products (gluconic acid and cellobionic acid) were determined if RAC was incubated at the above described  
 81 conditions. In addition, it is clearly visible that the HPAEC elution pattern of the  $\beta$ -glucosidase-mixture in buffer  
 82 indicated a peak that elutes at a similar time like gluconic acid.

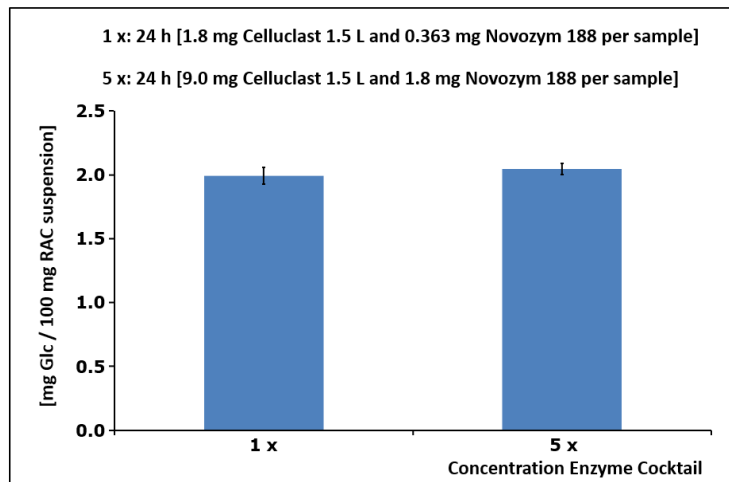

83

84 **Fig. S3.** Total RAC hydrolysis by using Celluclast 1.5l and Novozym 188. The RAC suspension (100 mg) was  
 85 incubated with two different concentrations of Celluclast 1.5l and Novozym 188 in a 50 mM ammonium acetate  
 86 buffer (pH 5.0). All samples were incubated at 50°C for 20 h. After incubation, samples were centrifuged (15 min,  
 87 15,000 x g, 4°C) and the supernatant was diluted twenty times prior to HPAEC analysis. We did not detect a  
 88 significant difference between the total amount of glucose released from 100 mg RAC suspension if samples were  
 89 incubated with an enzyme dosage five times higher than the initial dosage.

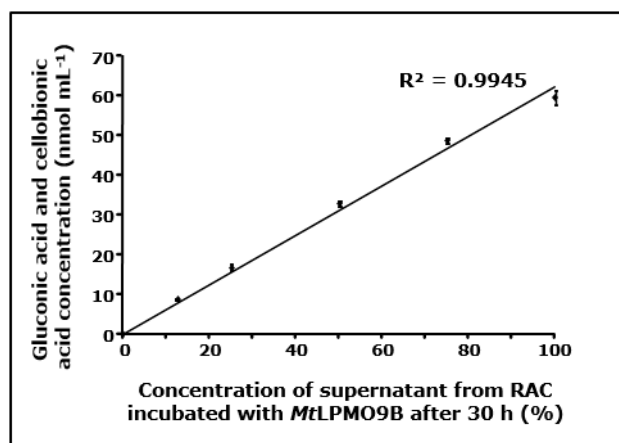

90  
 91 **Fig. S4** Verification of the linearity of the  $\beta$ -glucosidase-assisted method. The soluble fraction obtained from the  
 92 incubation of RAC ( $2.8 \text{ mg mL}^{-1}$ ) with *MtlPMO9B* ( $3 \text{ mg g}^{-1}$  substrate) in the presence of ascorbic acid after 30  
 93 h was diluted to obtain samples with varying concentrations of gluconic acid and cellobionic acid. Each diluted  
 94 sample was incubated with the same amount of  $\beta$ -glucosidase (1 U per sample). The concentration of gluconic  
 95 acid and cellobionic acid is proportional to the dilutions series ( $R^2 = 0.9945$ ).

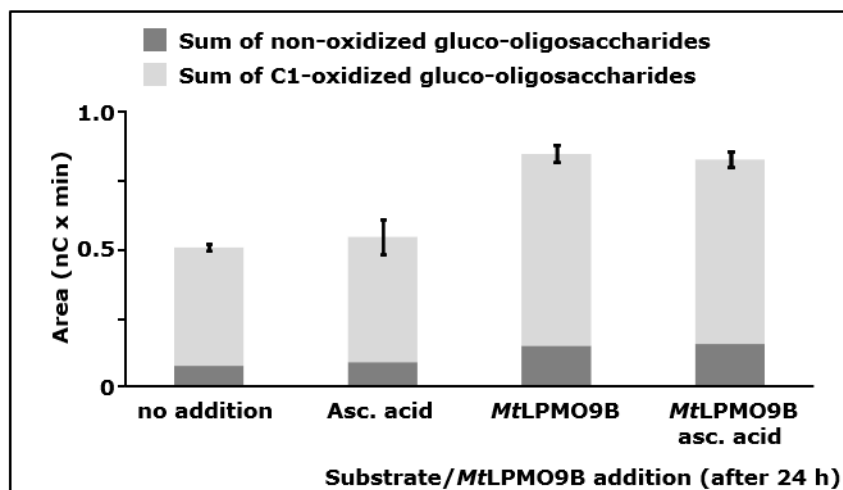

96  
 97 **Fig. S5** Activity of *MtLPMO9B* towards amorphous cellulose. The figure shows the sum of integrated peak areas  
 98 of released C1-oxidized and non-oxidized gluco-oligosaccharides after incubation of RAC with *MtLPMO9B* (5  
 99 mg g<sup>-1</sup> substrate) with RAC (1.5 mg mL<sup>-1</sup>) in the presence of ascorbic acid (1 mM) based on HPAEC. Samples  
 100 were incubated in 50 mM ammonium acetate buffer (pH 5.0) at 50°C for 48 h. The incubation was interrupted  
 101 after 24 h and samples were divided into four batches with the following treatments: first batch, no addition of  
 102 ascorbic acid and no addition of *MtLPMO9B*; second batch, another addition of 1 mM ascorbic acid but no addition  
 103 of *MtLPMO9B*; third batch, no ascorbic acid addition but another addition of *MtLPMO9B*  
 104 (5 mg g<sup>-1</sup> substrate); fourth batch, another addition of 1 mM ascorbic acid and another addition of *MtLPMO9B*  
 105 (5 mg g<sup>-1</sup> substrate). All incubations were performed in duplicate. The standard deviation is represented by error  
 106 bars, which correspond to one cumulated SD (error bar = ± SD<sub>tot</sub>; with SD<sub>tot</sub> = √SD<sub>1</sub><sup>2</sup> + SD<sub>2</sub><sup>2</sup> + ...).



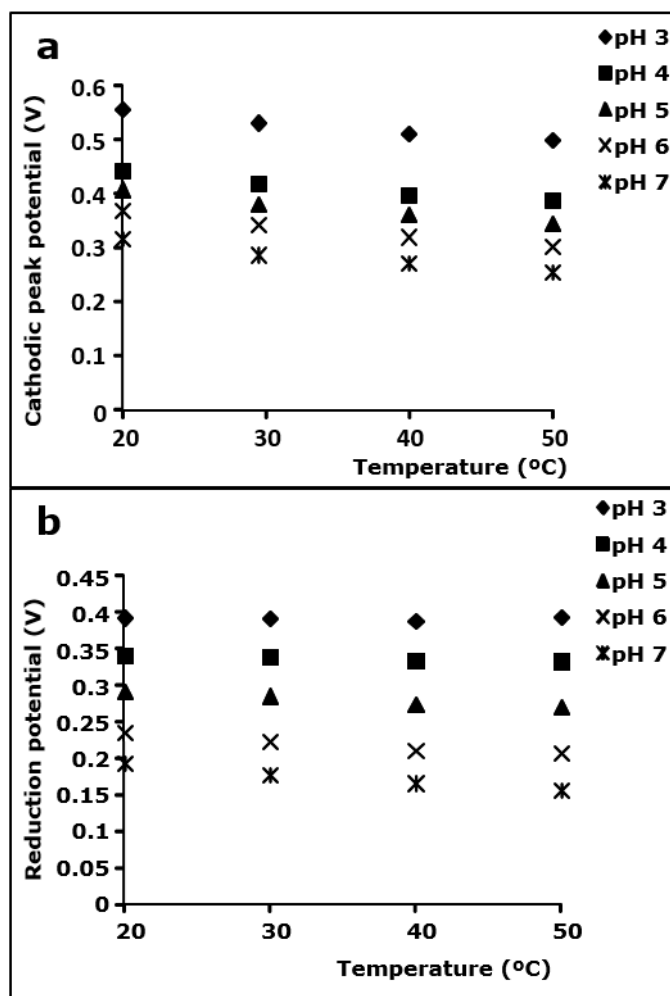

107  
 108 **Fig. S6** Redox potentials of ascorbic acid and 3-methylcatechol. The redox potentials of ascorbic acid (1 mM) and  
 109 3-methylcatechol (1 mM) were measured at different pH and temperature values by using cyclic voltammetry. **a**  
 110 – Cathodic peak potential  $E_{pc}$  of ascorbic acid at pH 2 to 7 and between 20 and 50°C. The reduction potential ( $E^\circ$ )  
 111 of ascorbic acid was not obtained due to the non-reversible reduction of ascorbic acid during cyclic voltammetry.  
 112 **b**– Reduction potential ( $E^\circ$ ) of 3-methylcatechol at c pH 2 to 7 and between 20 and 50°C. Standard deviations  
 113 (not presented) are between 0.001–0.026 (median 0.007) and 0.001–0.004 (median 0.001) for ascorbic acid and 3-  
 114 methylcatechol, respectively. All samples were measured in duplicate.

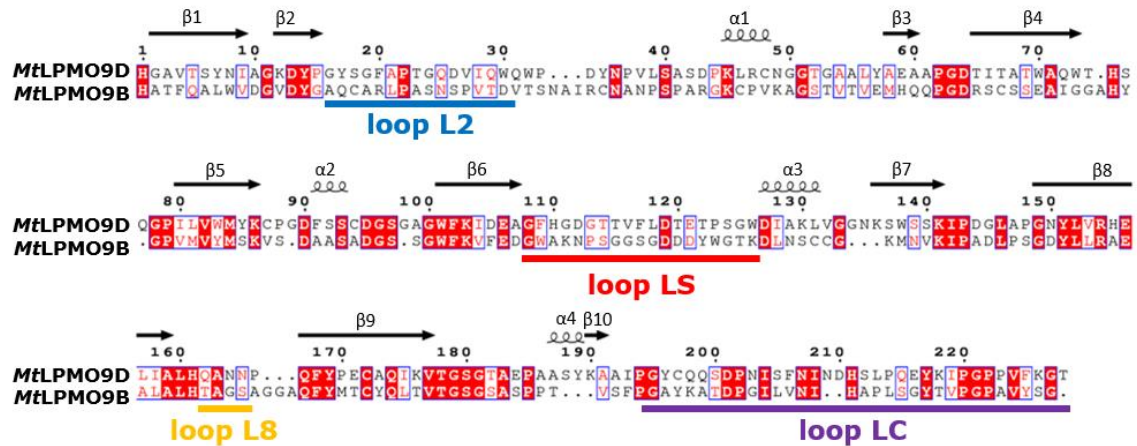

115

116

117

118

119

120

121

122

123

124

125

**Fig. S7** Structure-based sequence alignment of *MtLPMO9B* and *MtLPMO9D*. *MtLPMO9D* represents the structural features of *MtPMO3\** (PDB entry 5UFV), because both LPMOs share a 100% amino acid sequence identity (Span et al. 2017). The amino acid sequence of *MtLPMO9B* was aligned with the amino acid sequence of *MtPMO3\**. Conserved amino acid residues are presented as white letters on a red background. Amino acid residues that have comparable chemical and physical properties are presented as red letters within blue frames. The secondary structures  $\beta$ -strands (black arrow) and  $\alpha$ -helices (black helix) are based on *MtPMO3\** and shown above the sequences (Span et al. 2017). The amino acid residues of the four loop regions L2 (blue), L8 (yellow), LS (red) and LC (purple) are marked by colored lines below the sequences (Span et al. 2017). Sequences are presented without the signal sequence and start from the N-terminal histidine (His1). The structure-based sequence alignment was obtained by using ESPript (Robert and Gouet 2014).

| <b>a</b> | <b>Secondary structure (%)</b> | <b><i>MtLPMO9B</i></b> |             | <b><i>MtLPMO9D</i></b> |             |
|----------|--------------------------------|------------------------|-------------|------------------------|-------------|
|          |                                | <b>20°C</b>            | <b>95°C</b> | <b>20°C</b>            | <b>95°C</b> |
|          | <b>Helix</b>                   | 8.5                    | 2.8         | 7.2                    | 4.3         |
|          | <b>Antiparallel</b>            | 38.3                   | 25.7        | 32.4                   | 28.5        |
|          | <b>Parallel</b>                | 0                      | 0           | 0                      | 0           |
|          | <b>Turn</b>                    | 12.9                   | 16.3        | 12.7                   | 16.2        |
|          | <b>Others</b>                  | 40.3                   | 55.1        | 47.7                   | 51          |

  

| <b>b</b> | <b>Secondary structure (%)</b> | <b><i>MtPMO3*</i><br/>(5UFV)</b> | <b><i>MtLPMO9D</i><br/>(BeStSel)</b> |
|----------|--------------------------------|----------------------------------|--------------------------------------|
|          | <b>Helix</b>                   | 6.3                              | 7.2                                  |
|          | <b>Antiparallel</b>            | 26.9                             | 32.4                                 |
|          | <b>Parallel</b>                | 0                                | 0                                    |
|          | <b>Turn</b>                    | 16.8                             | 12.7                                 |
|          | <b>Others</b>                  | 50                               | 47.7                                 |

126  
127 **Fig. S8** Secondary structure composition of *MtLPMO9B* and *MtLPMO9D*. **a** The secondary structure composition  
128 (%) is based on the obtained CD spectra (far UV) of *MtLPMO9B* (0.20 mg mL<sup>-1</sup>) and *MtLPMO9D*  
129 (0.20 mg mL<sup>-1</sup>) at 20 and 95°C, respectively (see **Figs. 6a** and **6b**). The calculation of the secondary structure  
130 composition was based on the BeStSel method (Kardos and Micsonai 2017). **b** Comparison of the predicted  
131 secondary structure composition (%) of *MtLPMO9D*, which was based on the obtained CD spectra and BeStSel  
132 method, with the actual secondary structure composition based on *MtPMO3\** (PDB entry 5UFV) (Span et al.  
133 2017). See Methods for details.
